# Supplementary material for: The effects of the crosslinking position and degree of conjugation in perylene tetraanhydride bisimide microporous polymers on fluorescence sensing performance
Source: Royal Society of Chemistry journal article supplement (doi:10.1039/c9ra10384h), 2020-01-01
Supplement: c9ra10384h1.pdf [file c9ra10384h1.pdf]

## *Supplementary materials*

*for*

### **Effects of crosslinking position and degree of conjugated microporous polymers based on perylene tetraanhydride bisimide on the fluorescence sensing performance**

Chen Hu<sup>a</sup>, Ying-Chun Gao<sup>a</sup>, Can Zhang<sup>a</sup>, Min Liu<sup>a</sup>, and Tong-Mou Geng<sup>a\*</sup>

*a AnHui Province Key Laboratory of Optoelectronic and Magnetism Functional Materials;  
School of Chemistry and Chemical Engineering, Anqing Normal University, Anqing 246011,  
China*

#### **Corresponding Author:**

Tongmou Geng

Mailing Address: School of Chemistry and Chemical Engineering, Anqing Normal University,

Anqing 246011, China

E-mail addresses: gengtongmou@aqnu.edu.cn (TM Geng).

## Synthesis of DP<sub>4</sub>A<sub>0</sub> and DP<sub>4</sub>A<sub>2</sub>

The DP<sub>4</sub>A<sub>0</sub> was synthesized by Sonogashira-Hagihara cross coupling condensation reaction of arylhalides and arylethylenes. In a typical procedure, 1,4-diethynylbenzene (DEB) (0.1892 g, 1.5 mmol), PBr<sub>4</sub>ABr<sub>0</sub> (0.8581 g, 1 mmol), tetrakis-(triphenylphosphine) palladium(0) (40 mg, 0.0334 mmol) and copper(I) iodide (20 mg, 0.10 mmol) were placed in a dry 50 mL flask. The solids were dissolved in a mixture of anhydrous N-N-dimethylformamide (DMF) (8 mL) and anhydrous diisopropylamine (DIA) (8 mL). After the reaction mixture was degassed, the flask was placed in oil bath at 90 °C and stirred for 3 days. The solid product was then collected by filtration and washed well with chloroform, water, acetone and methanol each for four times (4×20 mL). Then, the solid was further washed with chloroform for 24 h, and methanol for 24 h using a Soxhlet extractor. The solid was dried at 50 °C in a vacuum oven for 24 h to afford black powder (1.0363 g, 99 %). Solid state CP/MAS <sup>13</sup>C NMR (δ ppm): 161.52 (C=O), 146.93 (ϕ), 128.18, 122.23 (ϕ), 93.40 (-C≡C-), 82.83, 77.87 (≡C-H). FT-IR (KBr, cm<sup>-1</sup>): 3415 (ν<sub>H<sub>2</sub>O</sub>); 3047 (ν<sub>ϕ-H</sub>); 2189 (ν<sub>C≡C</sub>); 1709, 1666 (perylene carboxylic acid bisimine characteristic peak); 1591, 1485, 1405 (ν<sub>C=C</sub>); 1331 (ν<sub>C-N</sub>); 744, 696 (ϕ-H, mono substituted benzene C-H out of plane deformation absorption peak). Anal. calcd. for C<sub>56</sub>H<sub>26</sub>O<sub>4</sub>N<sub>2</sub> (790.80): C 85.05, H 3.31, N 3.54; found: C 77.65, H 3.645, N 3.934.

DP<sub>4</sub>A<sub>2</sub> was synthesized using the similar procedures as described for DP<sub>4</sub>A<sub>0</sub>. PBr<sub>4</sub>ABr<sub>2</sub> (0.6792 g, 0.6667 mmol) was used. DP<sub>4</sub>A<sub>2</sub> was obtained as a black powder (0.8693 g, yield: 95.01 %). Solid state CP/MAS <sup>13</sup>C NMR (δ ppm): 161.86 (C=O),

130.81 ( $\phi$ ), 122.03 ( $\phi$ ), 90.97 ( $-\text{C}\equiv\text{C}-$ ), 83.05, 77.64 ( $\equiv\text{C}-\text{H}$ ). FT-IR (KBr,  $\text{cm}^{-1}$ ): 3415 ( $\nu_{\text{H}_2\text{O}}$ ); 3031 ( $\nu_{\phi-\text{H}}$ ); 2200 ( $\nu_{\text{C}\equiv\text{C}}$ ); 1714, 1667 (perylene carboxylic acid bisimine characteristic peak); 1591, 1501, 1405 ( $\nu_{\text{C}=\text{C}}$ ); 1335 ( $\nu_{\text{C}-\text{N}}$ ); 755, 546 ( $\phi-\text{H}$ , mono substituted benzene C-H out of plane deformation absorption peak). Anal. calcd. for  $\text{C}_{66}\text{H}_{30}\text{O}_4\text{N}_2$  (914.96): C 86.64, H 3.30, N 3.06; found: C 72.77, H 3.395, N 4.034.

Preparation, characterization, morphology analysis, pore performance, and fluorescent sensing performance of  $\text{DP}_2\text{A}_2$  refer to refs [14].

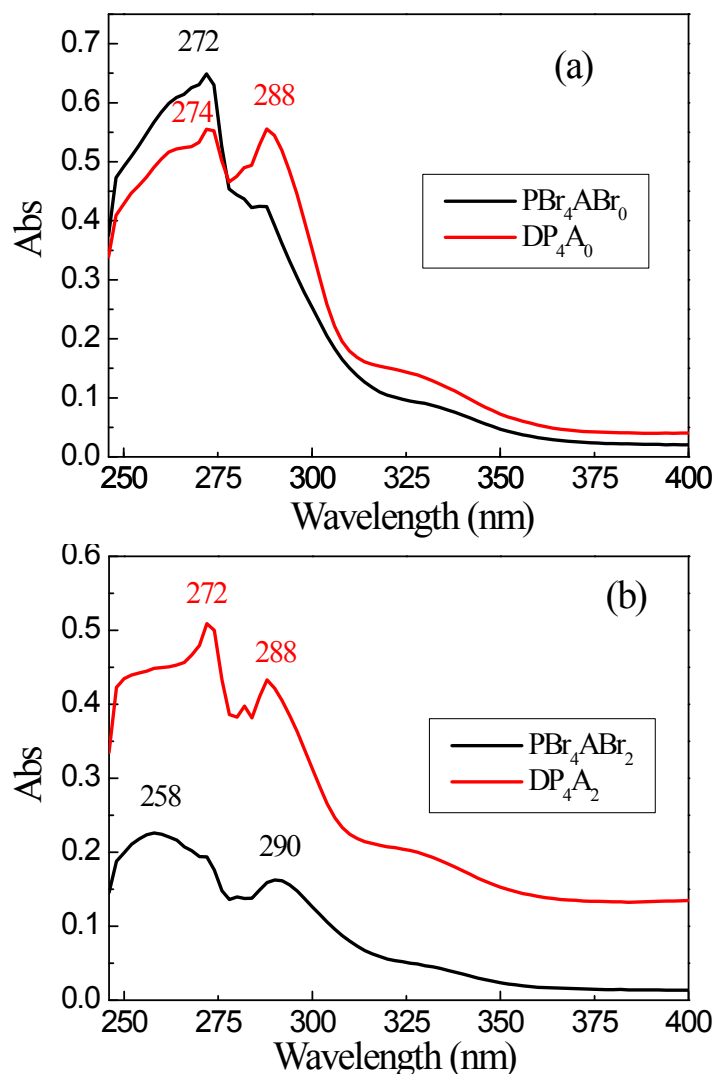

**Fig. S1** The solid UV-vis absorption spectra of the (a)  $\text{PBr}_4\text{ABr}_0$ ,  $\text{DP}_4\text{A}_0$ , and (b)  $\text{PBr}_4\text{ABr}_2$ ,  $\text{DP}_4\text{A}_2$ .

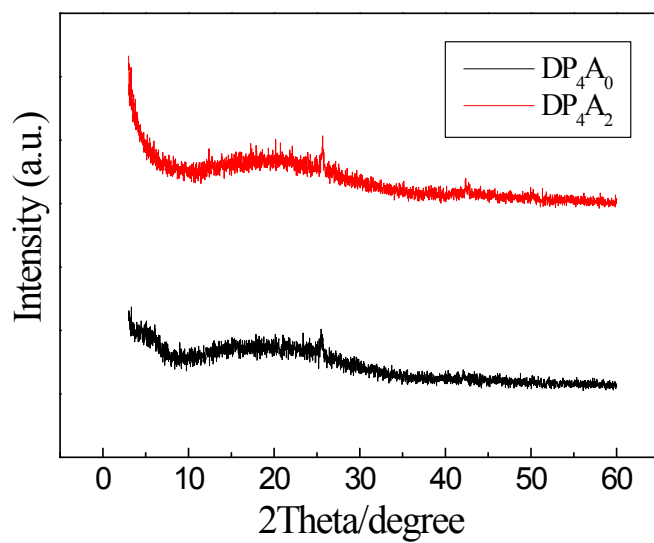

**Fig. S2** X-ray powder diffraction patterns of  $DP_4A_0$  and  $DP_4A_2$ .

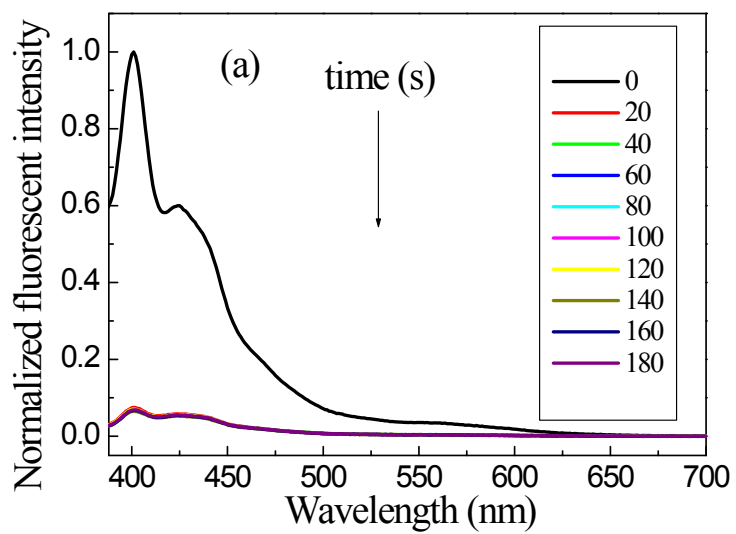

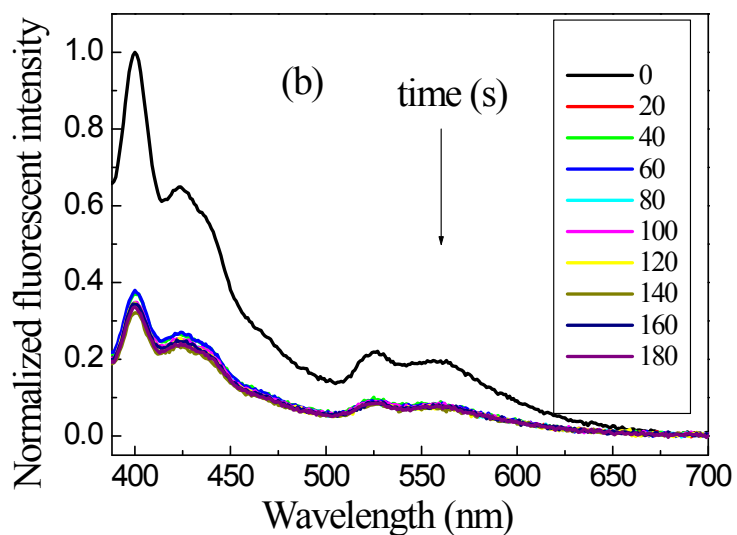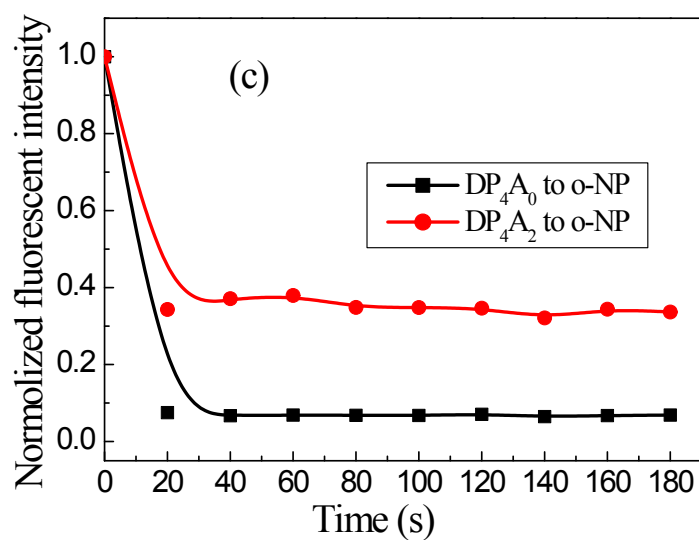

**Fig. S3** Normalized fluorescence intensity of the (a) DP<sub>4</sub>A<sub>0</sub> and (b) DP<sub>4</sub>A<sub>2</sub> upon addition of o-NP for different periods of time. (c) The plots of fluorescence maximum of DP<sub>4</sub>A<sub>0</sub> and DP<sub>4</sub>A<sub>2</sub> as the function of time (DP<sub>4</sub>A<sub>0</sub> dispersed in THF, excited at 370 nm, DP<sub>4</sub>A<sub>2</sub> dispersed in DOX, excited at 370 nm, [o-NP]= $2.5 \times 10^{-4}$  mol L<sup>-1</sup>).

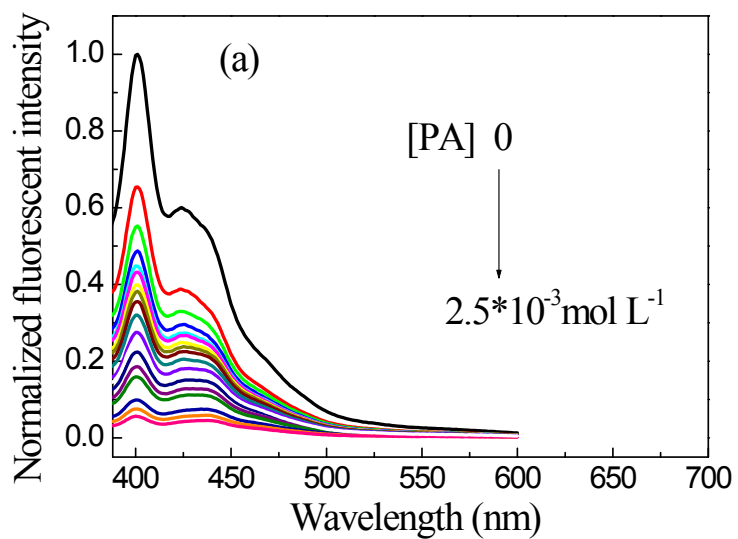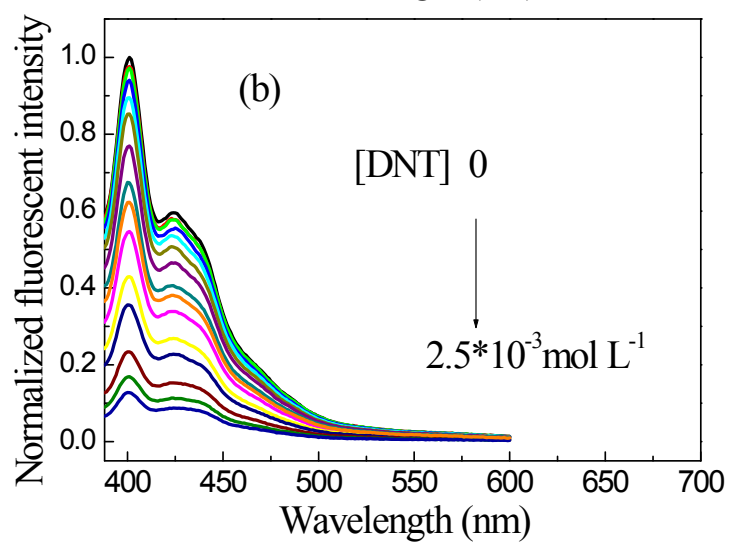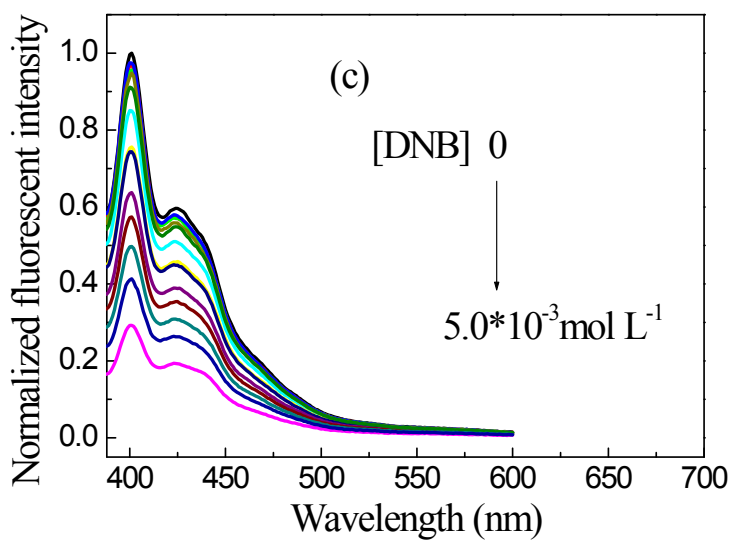

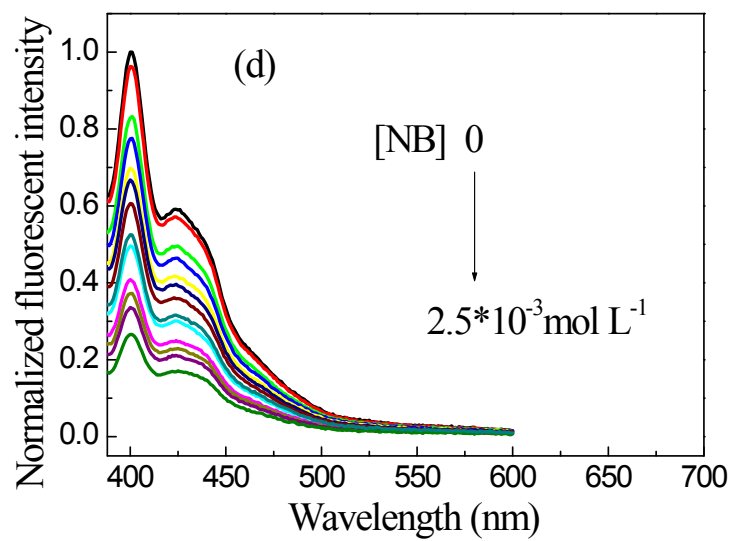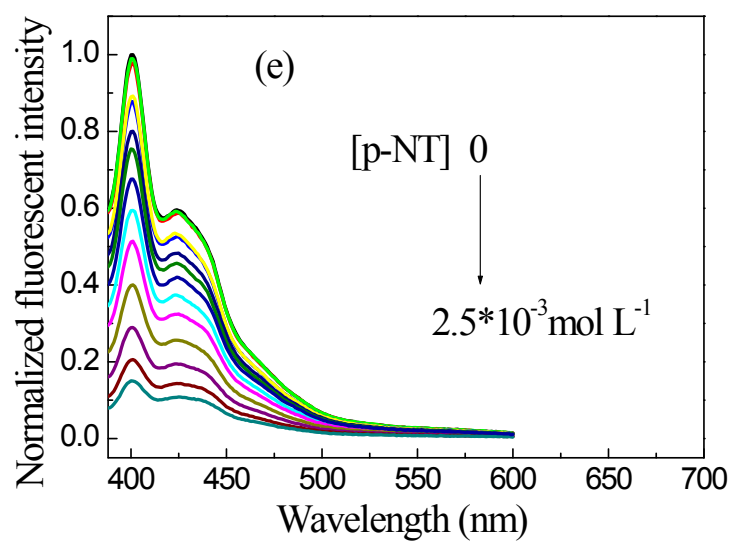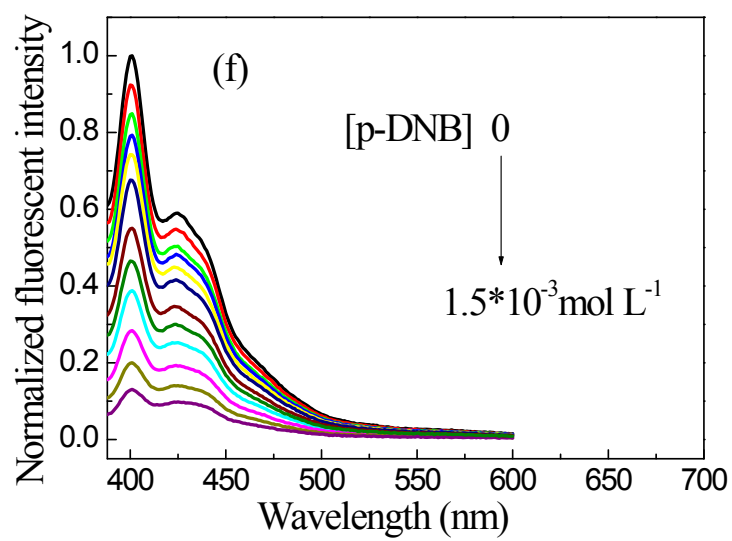

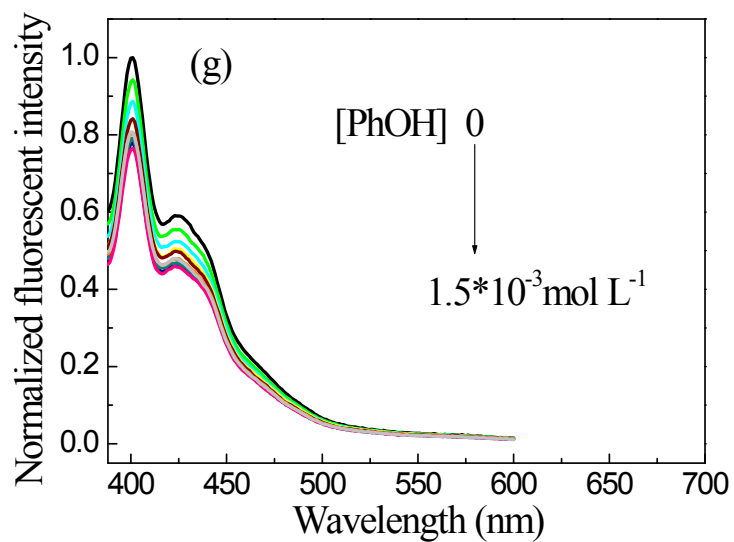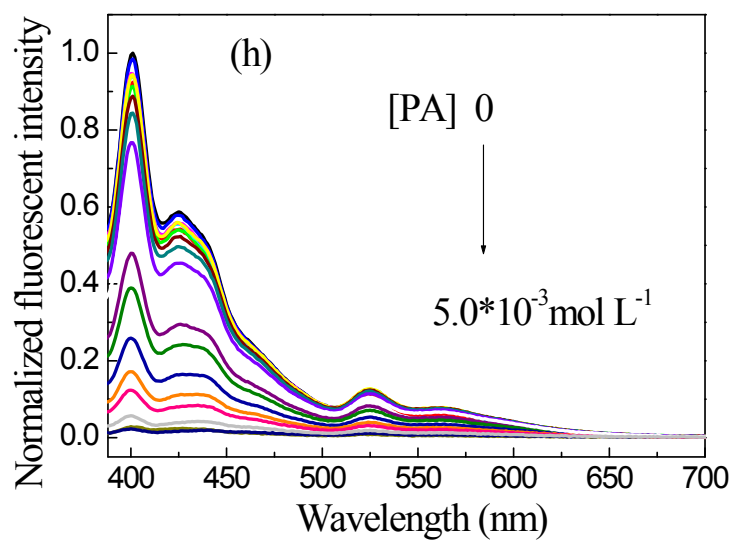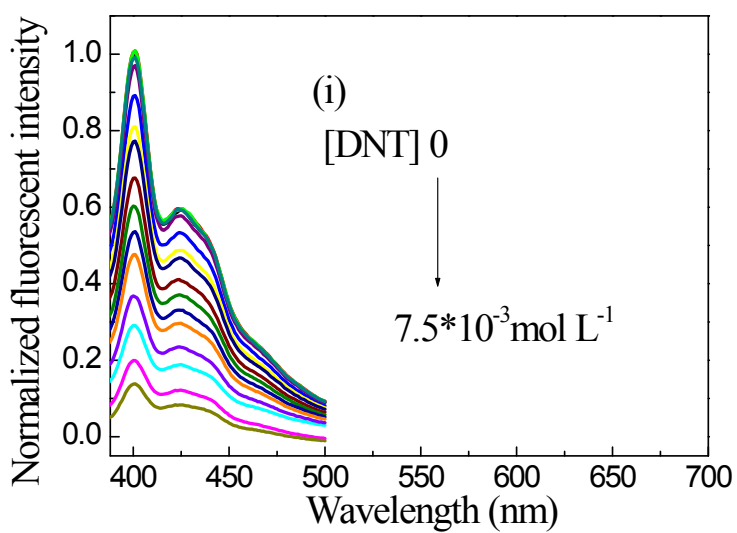



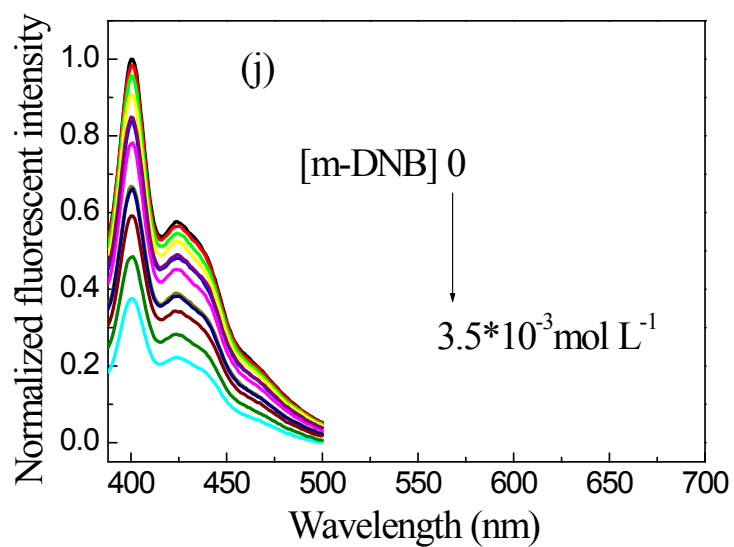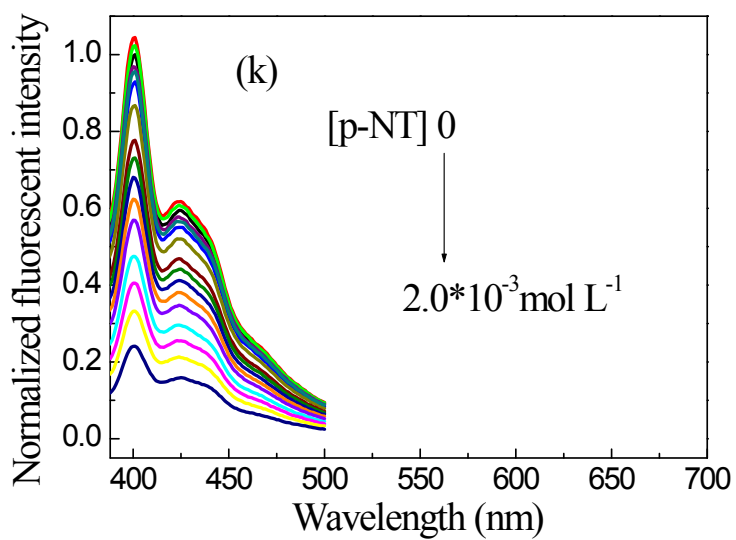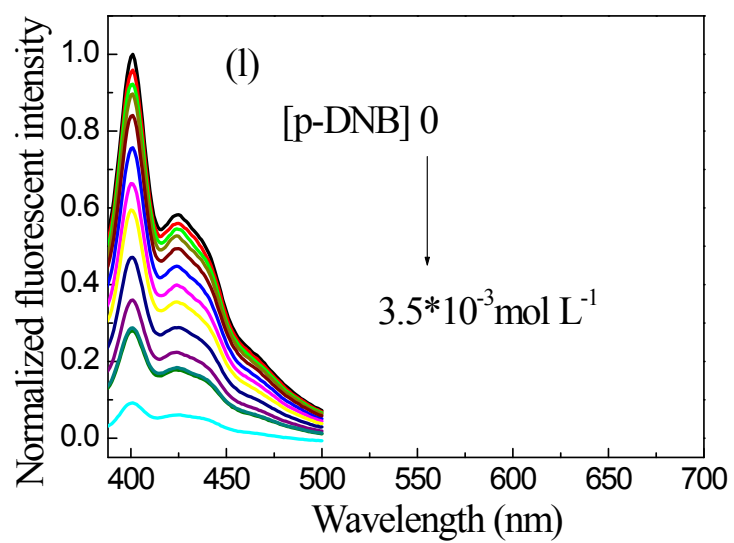

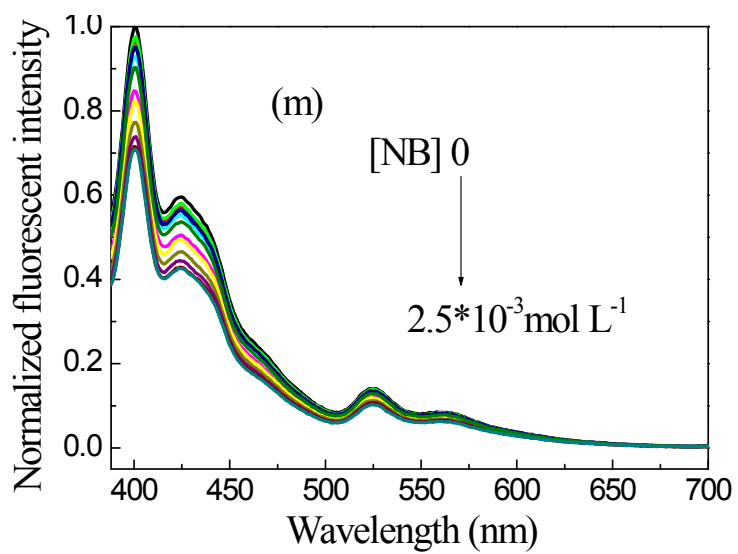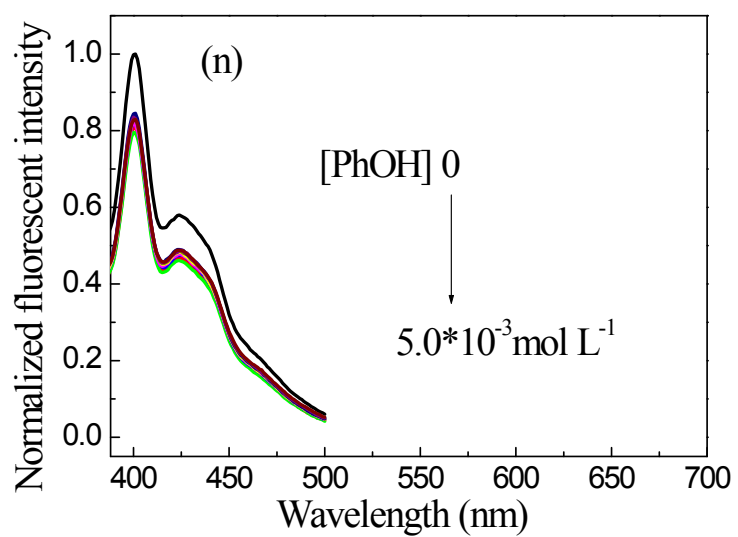

**Fig. S4** The changes of fluorescence spectra of the (a)-(g) DP<sub>4</sub>A<sub>0</sub> and (h)-(n) DP<sub>4</sub>A<sub>2</sub> in dispersions of the THF and DOX upon addition of NACs ( $1.0 \text{ mg mL}^{-1}$ , excited at 370 and 365 nm).

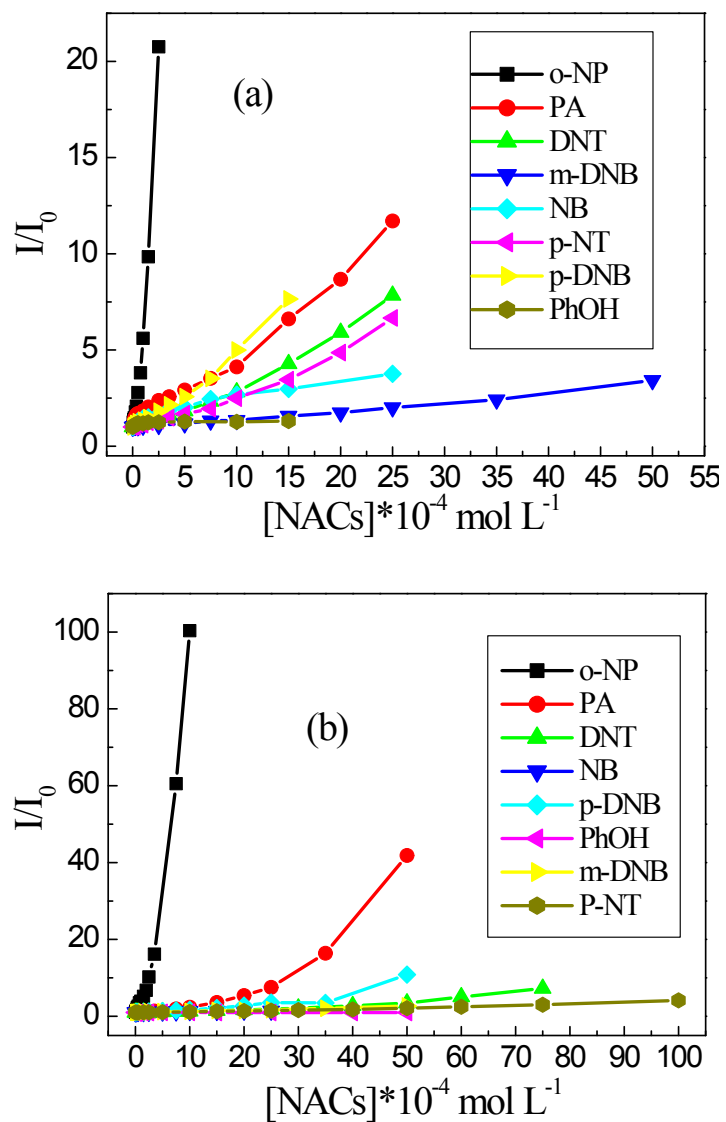

**Fig. S5** Relative fluorescence intensity ( $I/I_0$ ) of the (a) DP<sub>4</sub>A<sub>0</sub> and (b) DP<sub>4</sub>A<sub>2</sub> in suspensions upon addition of various concentrations of NACs (1.0 mg mL<sup>-1</sup>, excited at 370 and 365 nm).

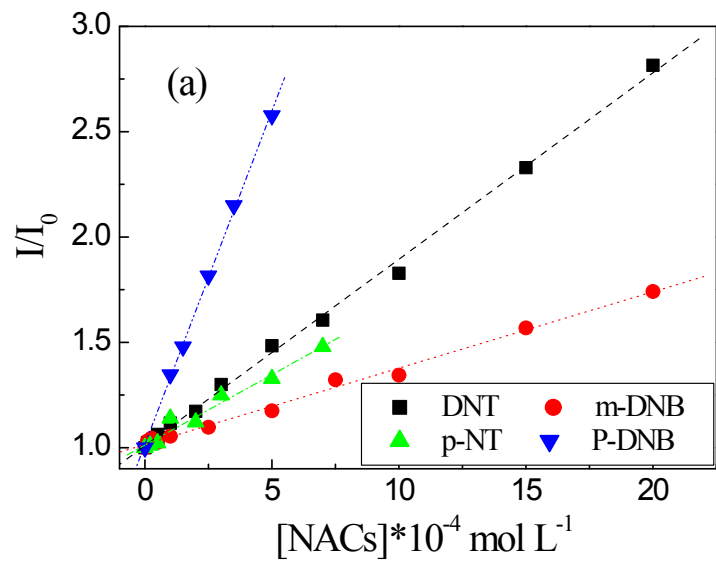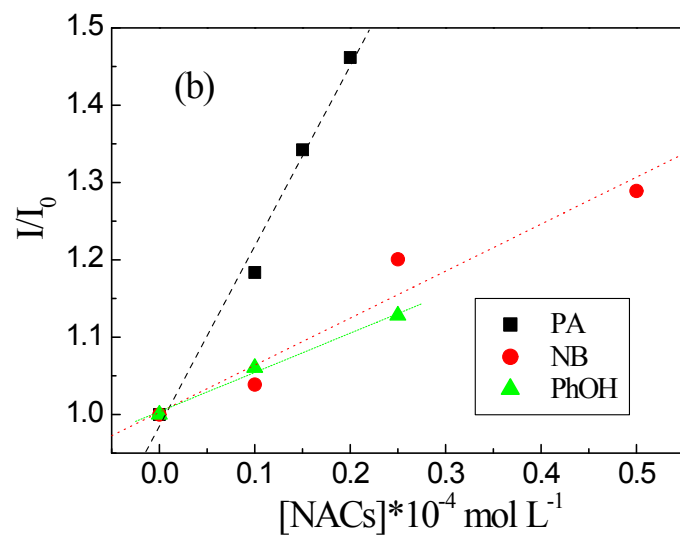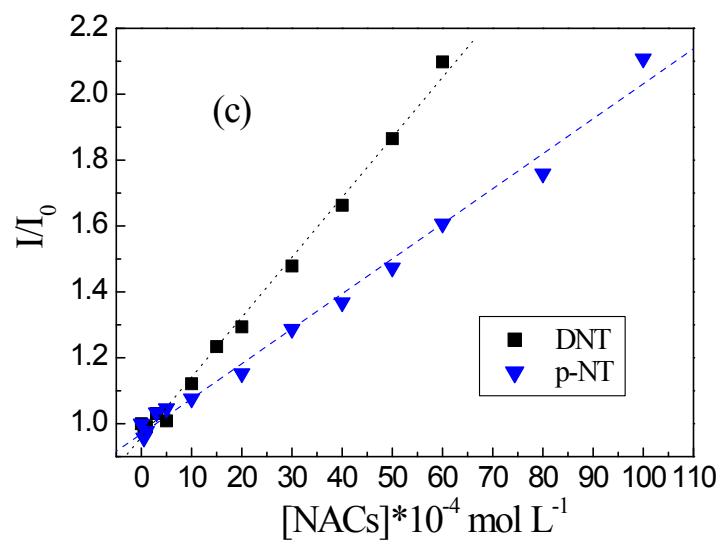

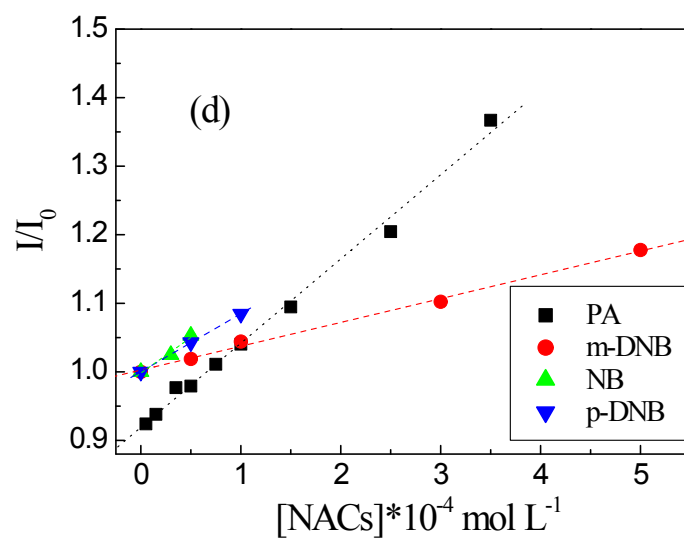

**Fig. S6** Stern–Volmer plots of (a) (b) DP<sub>4</sub>A<sub>0</sub> and (c) (d) DP<sub>4</sub>A<sub>2</sub> with various concentrations of other NACs (1.0 mg mL<sup>-1</sup>, excited at 370 and 365 nm).

**Table S1** The equation of  $I_0/I$  of DP<sub>4</sub>A<sub>0</sub> in THF (exciting at 370 nm) and DP<sub>4</sub>A<sub>2</sub> in DOX (exciting at 365 nm) to the concentrations of other NACs for suspension.

| CMPs                           | The equation                                 | Regression coefficient (R) | The concentration range of NACs (mol L <sup>-1</sup> ) | detection limit (mol L <sup>-1</sup> ) |
|--------------------------------|----------------------------------------------|----------------------------|--------------------------------------------------------|----------------------------------------|
| DP <sub>2</sub> A <sub>2</sub> | $I_0/I=1.0896+2.76\times 10^4[\text{PA}]$    | 0.9994                     | $5.0\times 10^{-6}$ to $2.5\times 10^{-5}$             | -                                      |
| DP <sub>4</sub> A <sub>0</sub> | $I_0/I=0.9964+2.17\times 10^4[\text{PA}]$    | 0.9918                     | 0 to $2.5\times 10^{-5}$                               | -                                      |
| DP <sub>4</sub> A <sub>0</sub> | $I_0/I=1.0094+8.85\times 10^2[\text{DNT}]$   | 0.9988                     | 0 to $20\times 10^{-4}$                                | -                                      |
| DP <sub>4</sub> A <sub>0</sub> | $I_0/I=1.0151+3.62\times 10^2[\text{m-DNB}]$ | 0.9968                     | 0 to $20\times 10^{-4}$                                | -                                      |
| DP <sub>4</sub> A <sub>0</sub> | $I_0/I=1.0029+6.08\times 10^3[\text{NB}]$    | 0.9721                     | 0 to $0.5\times 10^{-4}$                               | -                                      |
| DP <sub>4</sub> A <sub>0</sub> | $I_0/I=1.0124+6.69\times 10^3[\text{p-NT}]$  | 0.9831                     | 0 to $7.0\times 10^{-4}$                               | -                                      |
| DP <sub>4</sub> A <sub>0</sub> | $I_0/I=1.0160+3.17\times 10^3[\text{p-DNB}]$ | 0.9994                     | 0 to $5.0\times 10^{-4}$                               | -                                      |
| DP <sub>4</sub> A <sub>0</sub> | $I_0/I=1.0036+5.03\times 10^3[\text{PhOH}]$  | 0.9966                     | 0 to $0.25\times 10^{-4}$                              | -                                      |
| DP <sub>4</sub> A <sub>2</sub> | $I_0/I=0.9190+1.23\times 10^3[\text{PA}]$    | 0.9967                     | $5.0\times 10^{-6}$ to $3.5\times 10^{-4}$             | -                                      |
| DP <sub>4</sub> A <sub>2</sub> | $I_0/I=0.9590+1.82\times 10^2[\text{DNT}]$   | 0.9971                     | 0 to $60\times 10^{-4}$                                | -                                      |
| DP <sub>4</sub> A <sub>2</sub> | $I_0/I=1.0026+3.47\times 10^2[\text{m-DNB}]$ | 0.9981                     | 0 to $5\times 10^{-4}$                                 | -                                      |
| DP <sub>4</sub> A <sub>2</sub> | $I_0/I=0.9982+1.04\times 10^3[\text{NB}]$    | 0.9885                     | 0 to $0.5\times 10^{-4}$                               | -                                      |
| DP <sub>4</sub> A <sub>2</sub> | $I_0/I=0.9694+1.06\times 10^2[\text{p-NT}]$  | 0.9952                     | 0 to $100\times 10^{-4}$                               | -                                      |
| DP <sub>4</sub> A <sub>2</sub> | $I_0/I=1.0002+8.45\times 10^4[\text{p-DNB}]$ | 0.99997                    | 0 to $1.0\times 10^{-4}$                               | -                                      |

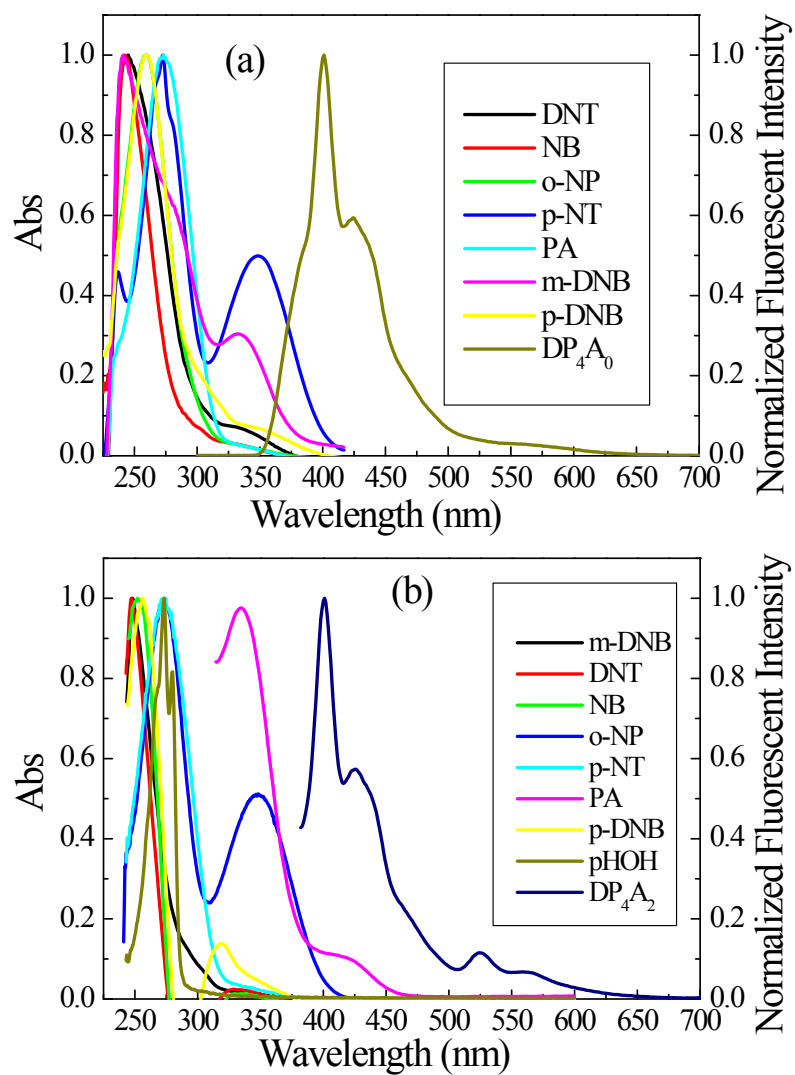

**Fig. S7** Normalized of analyte absorption of and emission spectra of DP<sub>4</sub>A<sub>0</sub> in THF (excitation wavelength: 370 nm) and DP<sub>4</sub>A<sub>2</sub> in DOX (excitation wavelength: 365 nm).

**Table S2** HOMO and LUMO calculations for CMPs and the NCAs. All the molecular orbital calculations were performed with the Gaussian 09 D. 01 program at the B3LYP/6-31G\* level.

| MO energy (eV) | DP <sub>4</sub> A <sub>0</sub> | DP <sub>4</sub> A <sub>2</sub> | o-NP   | PA      | p-DNB  | m-DNB  |
|----------------|--------------------------------|--------------------------------|--------|---------|--------|--------|
| LUMO           | -3.291                         | -3.015                         | -2.711 | -3.898  | -3.495 | -3.135 |
| HOMO           | -5.367                         | -5.688                         | -6.797 | -8.237  | -8.350 | -8.413 |
| MO energy (eV) | NB                             | DNT                            | p-NT   | PhOH    |        |        |
| LUMO           | -2.428                         | -2.977                         | -2.318 | -0.3331 |        |        |
| HOMO           | -7.591                         | -8.113                         | -7.364 | -6.566  |        |        |

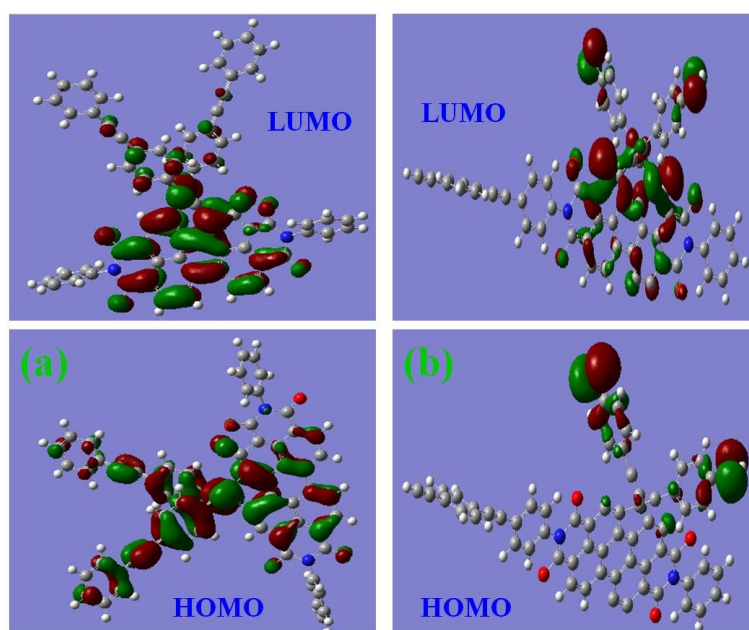

**Fig. S8** HOMO and LUMO orbital diagrams of CMPs (a) DP<sub>4</sub>A<sub>0</sub> and (b) DP<sub>4</sub>A<sub>2</sub>. The molecular orbital calculations were performed with the Gaussian 09 D. 01 program at the B3LYP/6-31G (d) level.



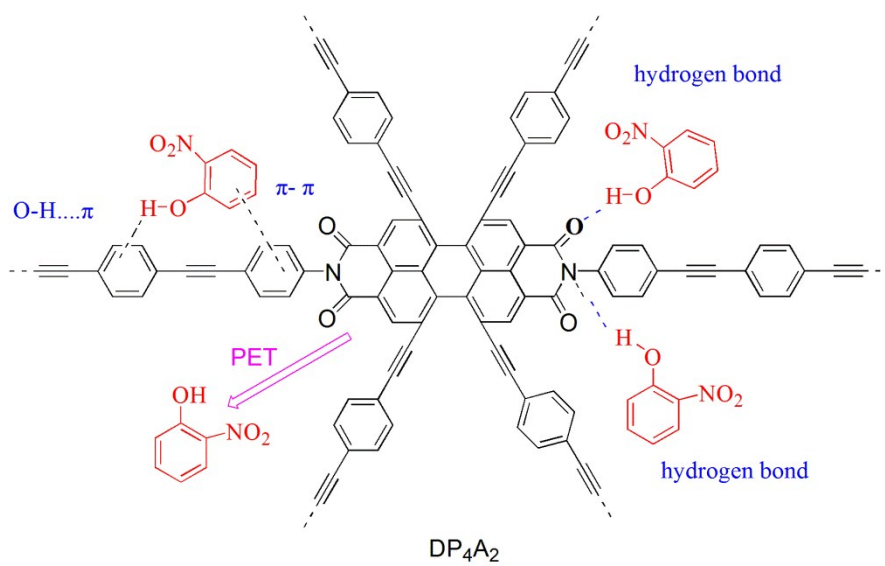

**Fig. S9.** Schematic image for the part of the 3-D network structure in DP<sub>4</sub>A<sub>2</sub> interact with o-NP.

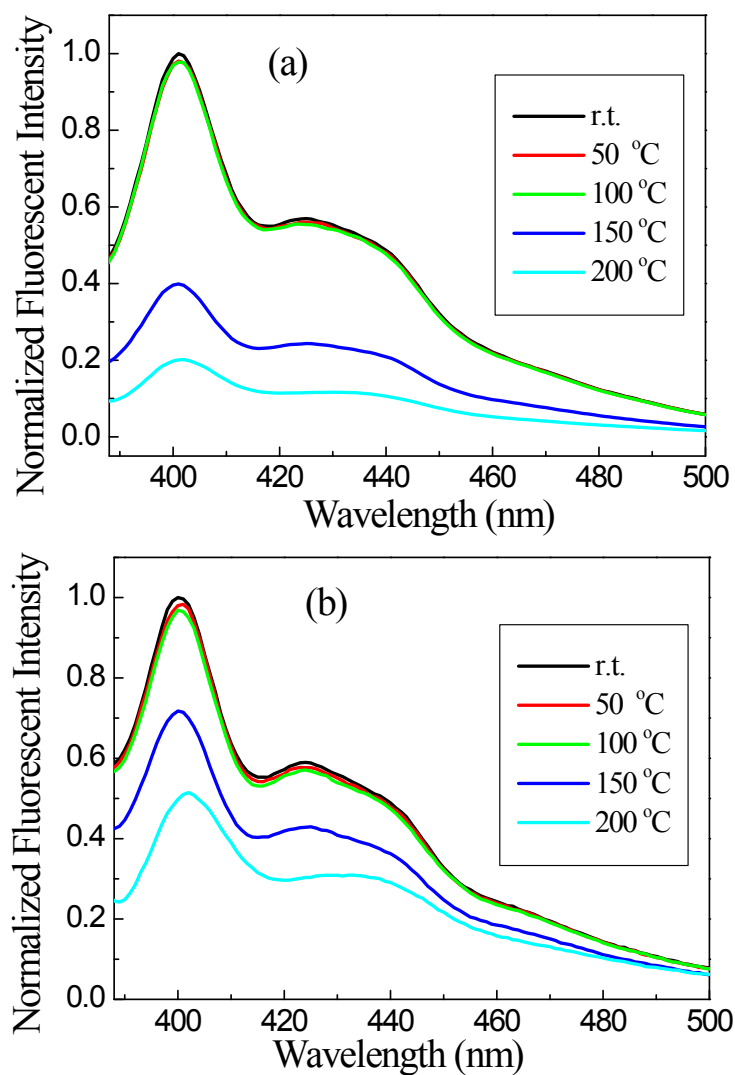

**Fig. S10** Fluorescent spectra of dispersion of DP<sub>4</sub>A<sub>0</sub> in THF (1.0 mg mL<sup>-1</sup>, λ<sub>ex</sub>=370 nm) and DP<sub>4</sub>A<sub>0</sub> in DOX (1.0 mg mL<sup>-1</sup>, λ<sub>ex</sub>=370 nm), whose powders before and after baking at different temperatures for 30 min in air.
